# Supplementary material for: Assessing the impact of Benzo[a]pyrene on Marine Mussels: Application of a novel targeted low density microarray complementing classical biomarker responses
Source: PLoS One. 2017 Jun 26;12(6):e0178460. doi: 10.1371/journal.pone.0178460 (PMC5484464; doi:10.1371/journal.pone.0178460)
Supplement: S2 Table — Shown is the description and the associated Biological processes (Additional information to Figs 1,2,3 and 4). (XLSX) [file pone.0178460.s005.xlsx]

## Sheet: Feuil1
Supplementary Table S2. The total array sequence names, their description and the associated Biological processes (Additional information to Figure. 1,2,3 and 4 ).
Biological process	Acession Number	Gene name
DNA Metabolism	KC545827.1	p53 tumor suppressor-like protein (p53)
	DQ060437.1	p63/p73-like protein
	DQ865150.1	p63/73-like protein
	DQ060436.1	delta-N p63/p73-like protein mRNA
	HQ424449.1	caspase 2 mRNA
	HQ424454.1	caspase 3/7-4 mRNA
	HQ424453.1	caspase 3/7-3 mRNA
	HQ424452.1	caspase 3/7-2 mRNA
	HQ424451.1	caspase 3/7-1 mRNA
	HQ424450.1	caspase 8 mRNA
	EF080944.1	putative caspase 3 mRNA
	KC545830.1	Bcl-2-associated X
	KC545831.1	Bax inhibitor-1 protein (BI1)
	AY679522.1	Mytilus edulis RAS mRNA, complete cds GenBank: AY679522.1
	AJ623737.1	Mytilus galloprovincialis haemolymph, cDNA clone gadd45a (Growth Arrest and DNA Damage or gadd45) /GPPD01946,
	AF227976.1	Mytilus edulis topoisomerase II mRNA, partial cds GenBank: AF227976.1
	AJ625058.1	t-cell lymphoma invasion and metastasis 1
	AJ624686.1	dna ligase i
	KC994893.1	TNF receptor-associated
	AJ626187.1	alkaline phosphatase
	AJ516519.1	adp-ribosylation factor 1
	AJ625243.1	delta-n p63 p73-like protein
	AJ625979.1	defender against cell death 1
	AJ623841.1	death-associated protein kinase 1
	AY611471.1	Mytilus trossulus p53 tumor suppressor-like protein mRNA, complete cds 2,205 bp linear mRNA Accession: AY611471.1
	AY579472.1	Mytilus edulis p53 tumor suppressor-like protein mRNA, complete cds 2,276 bp linear mRNA Accession: AY579472.1
	HM004082.1	Mytilus trossulus MDM-like protein mRNA, complete cds 2,793 bp linear mRNA Accession: HM004082.1
	AJ625479.1	guanine nucleotide binding2
	AJ623737.1	growth arrest and dna-damage-gamma
	AJ516600.1	h3family 3b
	AJ516582.1	h2a histonemember z
	AJ516663.1	h2a histonemember z
	AJ626388.1	histone aminotransferase 1
	AJ516560.1	member ras oncogene family
	AJ625027.1	member ras oncogene family
	AJ626239.1	member ras oncogene family
Immune Response	AB526218.1	serotonin receptor
	FN563147.1	MgC1q-domain-containing protein
	AF162335.1	antimicrobial peptide precursor myticin B
	AF334665.1	lysozyme mRNA
	AJ625163.1	lysozyme
	AJ625593.1	lysozyme
	JQ863366.1	c-type lysozyme mRNA
	JQ244771.1	goose-type lysozyme 2 mRNA
	JX185069.1	isolate YT24 goose-type lysozyme 1 mRNA
	AF177539.1	antimicrobial peptide MGD2b precursor
	FR873272.1	big defensin BD5
	HQ678180.1	putative testis-specific serine/threonine kinase mRNA
	EU678314.1	serine/threonine protein kinase 38 mRNA
	EU810204.1	mytilin D precursor
	AF177540.1	mytilin B precursor
	AY730626.1	mytilin C precursor
	AF162336.1	mytilin B antimicrobial peptide precursor
	KF110683.1	interleukine-1 receptor-associated kinase 1
	KC994891.1	Mytilus galloprovincialis interleukin-1 receptor-associated kinase 4 mRNA, complete cds 1,756 bp linear mRNA Accession: KC994891.1
	KC413026.1	Mytilus galloprovincialis toll-like receptor R precursor, mRNA, complete cds 2,736 bp linear mRNA Accession: KC413026.1
	KC413022.1	Mytilus galloprovincialis toll-like receptor N precursor, mRNA, complete cds 2,571 bp linear mRNA Accession: KC413022.1
	KC994891.1	interleukin-1 receptor-associated kinase 4 mRNA
	FR873278.1	Mytilus galloprovincialis mRNA for mytimacin-5 355 bp linear mRNA Accession: FR873278.1
	FR873277.1	Mytilus galloprovincialis mRNA for mytimacin-4 446 bp linear mRNA Accession: FR873277.1
	FR873276.1	Mytilus galloprovincialis mRNA for mytimacin-3 485 bp linear mRNA Accession: FR873276.1
	FR873275.1	Mytilus galloprovincialis mRNA for mytimacin-2 507 bp linear mRNA Accession: FR873275.1
	FR873274.1	Mytilus galloprovincialis mRNA for mytimacin-1 633 bp linear mRNA Accession: FR873274.1
	KC994890.1	Mytilus galloprovincialis Toll interacting protein mRNA, complete cds1,785 bp linear mRNA Accession: KC994890.1
	KC413028.1	Mytilus galloprovincialis toll-like receptor T precursor, mRNA, complete cds 3,145 bp linear mRNA Accession: KC413028.1
	KC413027.1	Mytilus galloprovincialis toll-like receptor S precursor, mRNA, complete cds 2,338 bp linear mRNA Accession: KC413027.1
	KC357782.1	Mytilus galloprovincialis myeloid differentiation factor 88 c mRNA, complete cds 2,309 bp linear mRNA Accession: KC357782.1
	KC357781.1	Mytilus galloprovincialis myeloid differentiation factor 88 b mRNA, complete cds 1,822 bp linear mRNA Accession: KC357781.1
	KC344669.1	Mytilus galloprovincialis toll-like receptor a precursor, mRNA, complete cds1,982 bp linear mRNA Accession: KC344669.1
	KC994892.1	Mytilus galloprovincialis ECSIT mRNA, complete cds 1,510 bp linear mRNA Accession: KC994892.1
	JX112712.1	Mytilus galloprovincialis myeloid differentiation factor 88a (MyD88a) mRNA, complete cds 1,593 bp linear mRNA Accession: JX112712.1
	KC413031.1	Mytilus galloprovincialis toll-like receptor W precursor, mRNA, complete cds 2,970 bp linear mRNA Accession: KC413031.1
	KC413030.1	Mytilus galloprovincialis toll-like receptor V precursor, mRNA, complete cds 2,932 bp linear mRNA Accession: KC413030.1
	KC413029.1	Mytilus galloprovincialis toll-like receptor U precursor, mRNA, complete cds 2,694 bp linear mRNA Accession: KC413029.1
	KC413026.1	Mytilus galloprovincialis toll-like receptor R precursor, mRNA, complete cds 2,736 bp linear mRNA Accession: KC413026.1
	KC413025.1	Mytilus galloprovincialis toll-like receptor Q precursor, mRNA, complete cds 2,721 bp linear mRNA Accession: KC413025.1
	KC413024.1	Mytilus galloprovincialis toll-like receptor P precursor, mRNA, complete cds 2,801 bp linear mRNA Accession: KC413024.1
	KC413023.1	Mytilus galloprovincialis toll-like receptor O precursor, mRNA, complete cds 2,463 bp linear mRNA Accession: KC413023.1
	KC413022.1	Mytilus galloprovincialis toll-like receptor N precursor, mRNA, complete cds 2,571 bp linear mRNA Accession: KC413022.1
	KC357780.1	Mytilus galloprovincialis toll-like receptor m mRNA, complete cds 2,750 bp linear mRNA Accession: KC357780.1
	KC357779.1	Mytilus galloprovincialis toll-like receptor l mRNA, complete cds 3,364 bp linear mRNA Accession: KC357779.1
	KC357778.1	Mytilus galloprovincialis toll-like receptor k mRNA, complete cds 3,905 bp linear mRNA Accession: KC357778.1
	KC357777.1	Mytilus galloprovincialis toll-like receptor j mRNA, complete cds 2,827 bp linear mRNA Accession: KC357777.1
	KC344673.1	Mytilus galloprovincialis toll-like receptor h precursor, mRNA, complete cds 3,002 bp linear mRNA Accession: KC344673.1
	KC344672.1	Mytilus galloprovincialis toll-like receptor g precursor, mRNA, complete cds 2,702 bp linear mRNA Accession: KC344672.1
	KC344671.1	Mytilus galloprovincialis toll-like receptor f precursor, mRNA, complete cds 2,742 bp linear mRNA Accession: KC344671.1
	KC344670.1	Mytilus galloprovincialis toll-like receptor e precursor, mRNA, complete cds 3,055 bp linear mRNA Accession: KC344670.1
	JX173687.1	Mytilus galloprovincialis toll-like receptor b mRNA, complete cds 4,025 bp linear mRNA Accession: JX173687.1
	KC994893.1	Mytilus galloprovincialis TNF receptor-associated factor 6 mRNA, complete cds 4,143 bp linear mRNA Accession: KC994893.1
	HQ127223.2	Mytilus galloprovincialis NF-kappaB transcription factor Rel mRNA, complete cds 2,604 bp linear mRNA Accession: HQ127223.2
	JX173690.1	Mytilus galloprovincialis toll-like receptor i mRNA, complete cds 2,149 bp linear mRNA Accession: JX173690.1
	JX173689.1	Mytilus galloprovincialis toll-like receptor d mRNA, complete cds 2,886 bp linear mRNA Accession: JX173689.1
	JX173688.1	Mytilus galloprovincialis toll-like receptor c mRNA, complete cds 2,459 bp linear mRNA Accession: JX173688.1
	AY364453.1	Mytilus edulis EP protein precursor, mRNA, complete cds 972 bp linear mRNA Accession: AY364453.1
	AJ624460.1	cyclophilin a
	AJ624927.1	porin precursor
	AY551094.1	Crassostrea gigas cavortin mRNA, complete cds 778 bp linear mRNA Accession: AY551094.1
	KF051277.1	Mytilus galloprovincialis lipopolysaccharide-induced TNF factor 1 mRNA, complete cds 1,815 bp linear mRNA Accession: KF051277.1
	KF110682.1	Mytilus galloprovincialis lipopolysaccharide-induced TNF factor 7 mRNA, complete cds1,620 bp linear mRNA Accession: KF110682.1
	KF110681.1	Mytilus galloprovincialis lipopolysaccharide-induced TNF factor 6 mRNA, complete cds1,129 bp linear mRNA Accession: KF110681.1
	KF110680.1	Mytilus galloprovincialis lipopolysaccharide-induced TNF factor 5 mRNA, complete cds 1,269 bp linear mRNA Accession: KF110680.1
	KF110679.1	Mytilus galloprovincialis lipopolysaccharide-induced TNF factor 4 mRNA, complete cds 1,563 bp linear mRNA Accession: KF110679.1
	KF110678.1	Mytilus galloprovincialis lipopolysaccharide-induced TNF factor 3 mRNA, complete cds1,904 bp linear mRNA Accession: KF110678.1
	KF110677.1	Mytilus galloprovincialis lipopolysaccharide-induced TNF factor 2-c mRNA, complete cds2,482 bp linear mRNA Accession: KF110677.1
	KF110676.1	Mytilus galloprovincialis lipopolysaccharide-induced TNF factor 2-b mRNA, complete cds 2,524 bp linear mRNA Accession: KF110676.1
	KF110675.1	Mytilus galloprovincialis lipopolysaccharide-induced TNF factor 2-a mRNA, complete cds2,557 bp linear mRNA Accession: KF110675.1
	KC545827.1	Mytilus galloprovincialis p53 tumor suppressor-like protein (p53) mRNA, complete cds 2,185 bp linear mRNA Accession: KC545827.1
	AY611471.1	Mytilus trossulus p53 tumor suppressor-like protein mRNA, complete cds 2,205 bp linear mRNA Accession: AY611471.1
	AY579472.1	Mytilus edulis p53 tumor suppressor-like protein mRNA, complete cds 2,276 bp linear mRNA Accession: AY579472.1
	HM004082.1	Mytilus trossulus MDM-like protein mRNA, complete cds 2,793 bp linear mRNA Accession: HM004082.1
	AJ624702.1	macrophage galactose n-acetyl-galactosamine specific lectin 2
	AJ625378.1	macrophage galactose n-acetyl-galactosamine specific lectin 2
	AJ623878.1	macrophage expressed gene 1
Translation	AJ625732.1	ribosomal proteinx-linked
	AJ624426.1	ribosomal protein sa
	AJ623948.1	ribosomal protein s9
	AJ624933.1	ribosomal protein s8
	AJ625366.1	ribosomal protein s7
	AJ624636.1	ribosomal protein s6
	AJ516873.1	ribosomal protein s5
	AJ624300.1	ribosomal protein s4
	AJ626403.1	ribosomal protein s3a
	AJ624779.1	ribosomal protein s3
	AJ624271.1	ribosomal protein s28
	AJ625324.1	ribosomal protein s27a
	AJ626374.1	ribosomal protein s27-like
	AJ625495.1	ribosomal protein s27
	AJ625548.1	ribosomal protein s26
	AJ624871.1	ribosomal protein s25
	AJ625356.1	ribosomal protein s24
	AJ626091.1	ribosomal protein s24
	AJ623563.1	ribosomal protein s21
	AJ624829.1	ribosomal protein s20
	AJ625317.1	ribosomal protein s20
	AJ625447.1	ribosomal protein s19
	AJ625342.1	ribosomal protein s18
	AJ625944.1	ribosomal protein s17
	AJ516491.1	ribosomal protein s16
	AJ625934.1	ribosomal protein s15a
	AJ623665.1	ribosomal protein s15
	AJ623890.1	ribosomal protein s14
	AJ625370.1	ribosomal protein s14
	AJ624429.1	ribosomal protein s13
	AJ626437.1	ribosomal protein s12
	AJ624086.1	ribosomal protein s11
	AJ625179.1	ribosomal protein s10
	AJ624757.1	ribosomal protein p1
	AJ625204.1	ribosomal protein p0
	AJ516361.1	ribosomal protein l9
	AJ624698.1	ribosomal protein l8
	AJ624649.1	ribosomal protein l7a
	AJ624878.1	ribosomal protein l7
	AJ625105.1	ribosomal protein l6
	AJ623547.1	ribosomal protein l5
	AJ625411.1	ribosomal protein l4
	AJ623317.1	ribosomal protein l38
	AJ625383.1	ribosomal protein l37a
	AJ625805.1	ribosomal protein l37
	AJ624125.1	ribosomal protein l36
	AJ626463.1	ribosomal protein l35a
	AJ625874.1	ribosomal protein l35
	AJ625993.1	ribosomal protein l34
	AJ625800.1	ribosomal protein l32
	AJ516855.1	ribosomal protein l31
	AJ624109.1	ribosomal protein l31
	AJ625834.1	ribosomal protein l30
	AJ625380.1	ribosomal protein l3
	AJ516392.1	ribosomal protein l28
	AJ625549.1	ribosomal protein l27a
	AJ625928.1	ribosomal protein l27
	AJ625957.1	ribosomal protein l26
	AJ624785.1	ribosomal protein l24
	AJ516444.1	ribosomal protein l23a
	AJ626199.1	ribosomal protein l23a
	AJ625145.1	ribosomal protein l22
	AJ625376.1	ribosomal protein l22
	AJ624732.1	ribosomal protein l21
	AJ516414.1	ribosomal protein l19
	AJ624844.1	ribosomal protein l18a
	AJ624394.1	ribosomal protein l18
	AJ624503.1	ribosomal protein l17
	AJ624925.1	ribosomal protein l15
	AJ624921.1	ribosomal protein l14
	AJ624488.1	ribosomal protein l13a
	AJ626218.1	ribosomal protein l13
	AJ626296.1	ribosomal protein l12e
	AJ624923.1	ribosomal protein l11
	AJ625528.1	ribosomal protein l10a
	AJ625604.1	ribosomal protein l10
	AJ625546.1	qm-like protein
	AJ624324.1	40s ribosomal protein s23
	AJ516364.1	eukaryotic translation elongation factor 1 beta 2
	AJ626184.1	eukaryotic translation initiation factorsubunit 6 48kda
	AJ624248.1	elongation factor 2
	AJ626406.1	eukaryotic translation initiation factorsubunit 9116kda
	AJ623848.1	eukaryotic translation initiation factorsubunit 6 48kda
	AJ626184.1	eukaryotic translation initiation factorsubunit 6 48kda
	AJ626303.1	eukaryotic translation initiation factorsubunit 547kda
	AJ625269.1	eukaryotic translation initiation factorsubunit 3
	AJ625841.1	eukaryotic translation initiation factorsubunit 239kda
	AJ625678.1	eukaryotic translation initiation factorisoform 1 isoform 2
	AJ516752.1	eukaryotic translation initiation factor 5a
	AJ624593.1	eukaryotic translation elongation factor 2
	AJ624922.1	eukaryotic translation elongation factor 1 alpha 1
Oxydative stress response	FM177867.1	SOD Mytilus galloprovincialis mRNA for superoxide dismutase (sod gene) GenBank: FM177867.1
	JN863296.1	Mytilus galloprovincialis CuZn superoxide dismutase mRNA, complete cds GenBank: JN863296.1
	JN863295.1	Mytilus galloprovincialis mitochondrial manganese superoxide dismutase mRNA, complete cds; nuclear gene for mitochondrial product GenBank: JN863295.1
	AY580271.1	CAT Mytilus edulis catalase mRNA, partial cds GenBank: AY580271.1
	AY743716.2	Mytilus galloprovincialis catalase mRNA, partial cds GenBank: AY743716.2
	JQ866922.1	Mytilus galloprovincialis phospholipid hydroperoxide glutathione peroxidase mRNA,
	JQ863367.1	Mytilus galloprovincialis thioredoxin 1 mRNA, complete cds 576 bp linear mRNA Accession: JQ863367.1
	JX117898.1	Crassostrea virginica thioredoxin mRNA, partial cds 292 bp linear mRNA Accession: JX117898.1
	HM749972.1	Crassostrea ariakensis thioredoxin mRNA, complete cds 849 bp linear mRNA Accession: HM749972.1
	HQ891311.1	Mytilus galloprovincialis selenium-dependent glutathione peroxidase mRNA, complete cds GenBank: HQ891311.1
Heat chock response	JF803805.1	Mytilus galloprovincialis small heat shock protein 24.1 mRNA, complete cds 989 bp linear mRNA Accession: JF803805.1
	JF803804.1	Mytilus galloprovincialis small heat shock protein 22 mRNA, complete cds 962 bp linear mRNA Accession: JF803804.1
	AB180909.1	Mytilus galloprovincialis hsp70 mRNA for heat shock protein 70, complete cds 2,175 bp linear mRNA Accession: AB180909.1
	AB180908.1	Mytilus galloprovincialis hsp70 mRNA for heat shock protein 70, complete cds 2,393 bp linear mRNA Accession: AB180908.1
	DQ158076.1	Mytilus galloprovincialis heat shock protein 27 (HSP27) mRNA, partial cds 123 bp linear mRNA Accession: DQ158076.1
	DQ205097.1	Mytilus edulis 70 kDa heat shock protein mRNA, partial cds 296 bp linear mRNA Accession: DQ205097.1
	AF172607.1	Mytilus edulis heat shock protein HSP70 (hsp70) mRNA, partial cds 570 bp linear mRNA Accession: AF172607.1
	HQ693569.1	Mytilus chilensis heat shock cognate 70 mRNA, partial cds 487 bp linear mRNA Accession: HQ693569.1
	HQ693565.1	Mytilus chilensis heat shock protein 90 mRNA, partial cds 253 bp linear mRNA Accession: HQ693565.1
	DQ178177.1	Mytilus galloprovincialis cytosolic heat shock cognate protein 70 mRNA, partial cds 469 bp linear mRNA Accession: DQ178177.1
	DQ178176.1	Mytilus galloprovincialis cytosolic heat shock cognate protein 70 mRNA, partial cds 469 bp linear mRNA Accession: DQ178176.1
	KF322135.2	Mytilus coruscus heat shock protein 70 mRNA, complete cds2,319 bp linear mRNA Accession: KF322135.2
	AF172607.1	Mytilus edulis heat shock protein HSP70 (hsp70) mRNA, partial cds 570 bp linear mRNA Accession: AF172607.1
	DQ178175.1	Mytilus galloprovincialis cytosolic heat shock protein 70 mRNA, partial cds 688 bp linear mRNA Accession: DQ178175.1
	DQ178174.1	Mytilus galloprovincialis cytosolic heat shock protein 70 mRNA, partial cds 682 bp linear mRNA Accession: DQ178174.1
	DQ205097.1	Mytilus edulis 70 kDa heat shock protein mRNA, partial cds 296 bp linear mRNA Accession: DQ205097.1
	EF140763.1	Mytilus sp. KL-2006 heat shock protein 90 mRNA, partial cds 285 bp linear mRNA Accession: EF140763.1
	EF140762.1	Mytilus sp. KL-2006 heat shock protein 70 mRNA, partial cds 437 bp linear mRNA Accession: EF140762.1
	AJ624969.1	FK605
	AJ624756.1	calriticulin
	AB262086.1	Crassostrea gigas CRT mRNA for calreticulin, complete cds 1,727 bp linear mRNA Accession: AB262086.1
	AJ624455.1	endoplasmic reticulum heat shock 70 kda protein
Phase I metabolism	JX885882.1	1/ Mytilus edulis cytochrome P450 family 3-like 3 protein (CYP3L3) mRNA,
	JX885879.1	2/ Mytilus edulis cytochrome P450 family 1-like 2 protein (CYP1L2) mRNA,
	JX885878.1	3/ Mytilus edulis cytochrome P450 family 1-like 1 protein (CYP1L1) mRNA,
	AF072855.1	4/ Mytilus galloprovincialis cytochrome p450 CYP4Y1 mRNA,
	AB479540.1	5/ Mytilus edulis Cyp3A2 mRNA for Cyp3A-like isoform 2,
	AB479539.1	6/ Mytilus edulis Cyp3A1 mRNA for Cyp3A-like isoform 1,
	EF645271.1	7/ Crassostrea gigas CYP356A1 (CYP356A1) mRNA,
	EF451959.1	8/ Crassostrea gigas cytochrome P450-related ptotein mRNA,
	EF057747.1	9/ Mytilus galloprovincialis P-glycoprotein mRNA,
	FJ516743.2	10/ Venerupis philippinarum aryl hydrocarbon receptor mRNA,
	FJ516743.2	11/ Venerupis philippinarum CYP450 family 4 mRNA,
	EF137955.1	Mytilus galloprovincialis multi-drug resistance protein (MDR1) mRNA, partial cds 2,525 bp linear mRNA Accession: EF137955.1
	AF397143.1	Mytilus edulis multidrug resistance-associated protein (MRP) mRNA, partial cds 414 bp linear mRNA Accession: AF397143.1
	ADP24121.1	Cytochrome P450 [Ruditapes philippinarum]
	AF527010.1	Mytilus galloprovincialis glutathione S-transferase GSTpi1 mRNA, complete cds GenBank: AF527010.1
	JX485638.1	Mytilus galloprovincialis glutathione S-transferase sigma 3 mRNA, complete cds GenBank: JX485638.1
	JX485637.1	Mytilus galloprovincialis glutathione S-transferase sigma 2 mRNA, complete cds GenBank: JX485637.1
	JX485635	Mytilus galloprovincialis glutathione S-transferase alpha mRNA, complete cds GenBank: JX485635
	AJ625131.1	microsomal glutathione s-transferase 3
	EF521414.1	Mytilus californianus ABCB/p-glycoprotein-like protein mRNA, complete cds 4,873 bp linear mRNA Accession: EF521414.1
	HE599220.1	Mytilus galloprovincialis mRNA for ATP-binding cassette sub-family G member 2-like (abcg2 gene)
	EF521415.1	Mytilus californianus ABCC/MRP-like protein mRNA, complete cds 4,679 bp linear mRNA Accession: EF521415.1
	HF912273.1	Mytilus galloprovincialis mRNA for ABCB/P-glycoprotein-like protein (mdr2 gene) 4,417 bp linear mRNA Accession: HF912273.1
	FM999809.2	Mytilus galloprovincialis mRNA for ABCB/P-glycoprotein-like protein (mdr1 gene) 4,271 bp linear mRNA Accession: FM999809.2
	HE599221.1	Mytilus galloprovincialis mRNA for ATP-binding cassette sub-family C ABCC/MRP-like protein (mrp gene)
	FM999810.2	Mytilus galloprovincialis mRNA for ABCC/MRP-like protein (mrp gene) 4,648 bp linear mRNA Accession: FM999810.2
Endocrine disruptors	AY679116.1	Mytilus edulis vitellogenin mRNA, partial cds 713 bp linear mRNA Accession: AY679116.1
	KC793981.1	Mytilus galloprovincialis vitellogenin mRNA, partial cds 347 bp linear mRNA Accession: KC793981.1
	AB257133.2	Mytilus edulis MeER2 mRNA for estrogen receptor, complete cds 1,744 bp linear mRNA Accession: AB257133.2
	AB257132.2	Mytilus edulis MeER1 mRNA for estrogen receptor, complete cds 2,036 bp linear mRNA Accession: AB257132.2
	KF031121.1	Mytilus galloprovincialis 17 beta-hydroxysteroid dehydrogenase 12 mRNA, complete cds GenBank: KF031121.1
	KF031120.1	Mytilus galloprovincialis 17 beta-hydroxysteroid dehydrogenase 10 mRNA, complete cds GenBank: KF031120.1
	AJ625081.1	hydroxysteroid dehydrogenase like 2
	AJ625406.1	hydroxysteroid (17-beta) dehydrogenaseisoform cra_a
	AJ624194.1	juvenile hormone diol kinase
	AJ624753.1	juvenile hormone diol kinase
Mitochondrial activity	JN673724.1	Mytilus galloprovincialis D-octopine dehydrogenase (OcDH) mRNA, complete cds GenBank: JN673724.1
	KF220406.1	Mytilus trossulus isolate nd6_ES NADH dehydrogenase subunit 6 (nd6) mRNA, partial cds; mitochondrial
	KF220403.1	Mytilus trossulus isolate nd3_ES NADH dehydrogenase subunit 3 (nd3) mRNA, partial cds; mitochondrial
	KF220389.1	Mytilus trossulus isolate nd1_EL NADH dehydrogenase subunit 1 (nd1) mRNA, partial cds; mitochondrial
	FJ495091.1	Crassostrea ariakensis malate dehydrogenase mRNA, complete cds GenBank:
	KF220399.1	Mytilus trossulus isolate cox2_ES cytochrome c oxidase subunit 2 (cox2) mRNA, partial cds; mitochondrial
	KF220398.1	Mytilus trossulus isolate cox1_ES cytochrome c oxidase subunit 1 (cox1) mRNA, partial cds; mitochondrial
	KF220386.1	Mytilus trossulus isolate cox2_EL cytochrome c oxidase subunit 2 (cox2) mRNA, partial cds; mitochondrial
	KF220385.1	Mytilus trossulus isolate cox1_EL cytochrome c oxidase subunit 1 (cox1) mRNA, partial cds; mitochondrial
	KF220400.1	Mytilus trossulus isolate cox3_ES cytochrome c oxidase subunit 3 (cox3) mRNA, partial cds; mitochondrial
	AJ626427.1	3-hydroxyisobutyrate dehydrogenase
	AJ624775.1	mitochondrial aldehyde dehydrogenase 2
	AJ623584.1	nadh dehydrogenase subunit 5
	AJ624828.1	dihydrouridine synthase 3-like
	AJ624828.1	dihydrouridine synthase 3-like
	AF159717.1	Mytilus edulis p-glycoprotein mRNA, partial cds 446 bp linear mRNA Accession:
	AY580269.1	Mytilus edulis ATP synthase beta subunit mRNA, partial cds 1,281 bp linear mRNA Accession: AY580269.1
	AY580258.1	Mytilus californianus ATP synthase beta subunit mRNA, partial cds 1,044 bp linear mRNA Accession: AY580258.1
	DQ988694.1	Mytilus edulis isolate SJB204 vacuolar ATP synthase subunit B mRNA, partial cds 525 bp linear mRNA Accession: DQ988694.1
	HE599220.1	Mytilus galloprovincialis mRNA for ATP-binding cassette sub-family G member 2-like (abcg2 gene) 2,129 bp linear mRNA Accession: HE599220.1
	AJ626027.1	glutaryl-coenzyme a dehydrogenase
	AJ624584.1	cytochrome b
	AJ624838.1	cytochrome b
	AJ623880.1	cytochrome oxidase subunit i
	AJ516500.1	cytochrome csubunit va
	AJ516636.1	cytochrome c oxidase subunit via polypeptide 1
	AJ624079.1	cytochrome c oxidase subunit iv
	AJ624894.1	cytochrome c
	KF220394.1	Mytilus trossulus isolate nd5_EL NADH dehydrogenase subunit 5 (nd5) mRNA, partial cds; mitochondrial
	KF220405.1	Mytilus trossulus isolate nd5_ES NADH dehydrogenase subunit 5 (nd5) mRNA, partial cds; mitochondrial
	KF220403.1	Mytilus trossulus isolate nd3_ES NADH dehydrogenase subunit 3 (nd3) mRNA, partial cds; mitochondrial
	KF220402.1	Mytilus trossulus isolate nd2_ES NADH dehydrogenase subunit 2 (nd2)
	KF220401.1	Mytilus trossulus isolate nd1_ES NADH dehydrogenase subunit 1 (nd1) mRNA,
	KF220395.1	Mytilus trossulus isolate nd6_EL NADH dehydrogenase subunit 6 (nd6) mRNA, partial cds; mitochondrial
	KF220393.1	Mytilus trossulus isolate nd4L_EL NADH dehydrogenase subunit 4L (nd4L) mRNA, partial cds; mitochondrial
	KF220392.1	Mytilus trossulus isolate nd4_EL NADH dehydrogenase subunit 4 (nd4) mRNA, partial cds; mitochondrial
	KF220391.1	Mytilus trossulus isolate nd3_EL NADH dehydrogenase subunit 3 (nd3) mRNA, partial cds; mitochondrial
	KF220390.1	Mytilus trossulus isolate nd2_EL NADH dehydrogenase subunit 2 (nd2) mRNA, partial cds; mitochondrial
	KF220389.1	Mytilus trossulus isolate nd1_EL NADH dehydrogenase subunit 1 (nd1) mRNA, partial cds; mitochondrial
	KF220406.1	Mytilus trossulus isolate nd6_ES NADH dehydrogenase subunit 6 (nd6) mRNA, partial cds; mitochondrial 462 bp linear mRNA Accession: KF220406.1
	EU152956.1	Crassostrea gigas clone 260 NADH dehydrogenase 1-like mRNA, partial sequence; mitochondrial 346 bp linear mRNA Accession: EU152956.1
	EU152923.1	Crassostrea gigas clone 40 NADH dehydrogenase 4L-like mRNA, complete sequence; mitochondrial 389 bp linear mRNA Accession: EU152923.1
	KF220388.1	Mytilus trossulus isolate cytb_EL cytochrome b (cytb) mRNA, partial cds; mitochondrial 468 bp linear mRNA Accession: KF220388.1
	AJ624340.1	mitochondrial cytochrome c oxidase subunit 5b isoform 1
	AJ516895.1	mitochondrial cytochrome c oxidase subunit 4
	AJ624625.1	mitochondrial atp synthase lipid binding protein precursor
	AJ624528.1	mitochondrial atp synthase gamma-subunit
Carbohydrate metabolism	JX273654.1	Mytilus galloprovincialis acetyl-CoA carboxylase mRNA, partial cds 716 bp linear mRNA Accession: JX273654.1
	FJ268734.1	Mytilus galloprovincialis 3-ketoacyl-coenzyme A thiolase mRNA, partial cds 618 bp linear mRNA Accession: FJ268734.1
	AM076953.1	Crassostrea gigas mRNA for pyruvate kinase (pk gene) 2,121 bp linear mRNA
	AM076954.1	Crassostrea gigas mRNA for hexokinase (hk gene) 2,688 bp linear mRNA Accession: AM076954.1
	JN595865.1	Mytilus galloprovincialis hexokinase mRNA, partial cds 488 bp linear mRNA Accession: JN595865.1
	AY580275.1	Mytilus edulis triosephosphate isomerase mRNA, partial cds 444 bp linear mRNA Accession: AY580275.1
	AY580275.1	Mytilus edulis triosephosphate isomerase mRNA, partial cds 444 bp linear mRNA Accession: AY580275.1
	EF570419.1	Mytilus trossulus mannose-6-phosphate isomerase (MPI-B) mRNA, partial cds 1,277 bp linear mRNA Accession: EF570419.1
	EF570418.1	Mytilus trossulus mannose-6-phosphate isomerase (MPI-A) mRNA, partial cds 1,315 bp linear mRNA Accession: EF570418.1
	EF570417.1	Mytilus edulis mannose-6-phosphate isomerase (MPI-B) mRNA, partial cds 1,277 bp linear mRNA Accession: EF570417.1
	EF570416.1	Mytilus edulis mannose-6-phosphate isomerase (MPI-A) mRNA, partial cds 1,315 bp linear mRNA Accession: EF570416.1
	AJ624093.1	chitinase
	AJ625778.1	chitinase
	AJ624637.1	chitinase
	AJ624087.1	chitinase b precursor
	AJ625051.1	chitinase 1
	EF535882.1	Mytilus galloprovincialis chitin synthase (CS1) mRNA, complete cds 6,846 bp linear mRNA Accession: EF535882.1
	AJ625569.1	chitinase
	AY580274.1	Mytilus edulis phosphofructokinase mRNA, partial cds 516 bp linear mRNA Accession: AY580274.1
	AY580261.1	Mytilus californianus phosphofructokinase mRNA, partial cds 507 bp linear mRNA Accession: AY580261.1
	AJ516687.1	acyl-coenzyme along chain
	AJ624743.1	acetyl-coenzyme a acyltransferase 1
	AJ625322.1	glucose-methanol-choline oxidoreductase
	AJ516599.1	glucose-6-phosphate 1-dehydrogenase
	AJ626213.1	glucose dehydrogenase
	AJ625142.1	glyceraldehyde-3-phosphate dehydrogenase
	AJ624681.1	gdp-l-fucose:beta-d-galactoside 2-alpha-1-fucosyltransferase
	AJ625142.1	glyceraldehyde-3-phosphate dehydrogenase
Cytoskeleton	HQ690238.1	Mytilus edulis beta-tubulin mRNA, partial cds GenBank: HQ690238.1
	HQ678184.1	Mytilus edulis putative beta-tubulin mRNA, partial cds GenBank: HQ678184.1
	HM537081.1	Mytilus galloprovincialis alpha-tubulin mRNA, partial cds GenBank: HM537081.1
	AF172606.1	Mytilus edulis actin mRNA, partial cds GenBank: AF172606.1
	HQ864862.1	Mytilus edulis complex sp. DC-2011 isolate ET8_3 actin (mac-1) gene, intron GenBank: HQ864862.1
	HQ864861.1	Mytilus edulis complex sp. DC-2011 isolate ET2_11 actin (mac-1) gene, intron GenBank: HQ864861.1
	HQ864860.1	Mytilus edulis complex sp. DC-2011 isolate 02_12_07_T6 actin (mac-1) gene, intron GenBank: HQ864860.1
	AB052656.1	Mytilus galloprovincialis mRNA for calponin-like protein, complete cds GenBank: AB052656.1
	AJ249992.1	Mytilus galloprovincialis partial mRNA for myosin heavy chain (MHC gene), from pedal retractor muscle 5,463 bp linear mRNA Accession: AJ249992.1
	AJ249991.1	Mytilus galloprovincialis partial mRNA for myosin heavy chain (MHC gene), from catch muscle 5,545 bp linear mRNA Accession: AJ249991.1
	U40036.1 GI	Mytilus edulis catch muscle myosin heavy chain mRNA, partial cds 1,023 bp linear mRNA Accession: U40036.1 GI: 1086580
	AB016070.1	Mytilus galloprovincialis mRNA for paramyosin, complete cds 3,481 bp linear mRNA Accession: AB016070.1
	AJ249993.1	Mytilus galloprovincialis mRNA for catchin (catchin gene) 3,530 bp linear mRNA Accession: AJ249993.1
	AJ547618.1	Crassostrea gigas partial mRNA for paramyosin protein 462 bp linear mRNA Accession: AJ547618.1
	AJ516886.1	dynein light chain 2
	AJ626386.1	actin binding protein
	AJ625866.1	alpha 2 isoform 2
	AJ625595.1	alpha 2 isoform 2
	AJ623937.1	tubulin alpha 1
	AJ625357.1	troponin i
	AJ625392.1	tropomyosin
	AJ624120.1	calponin-like protein
	AJ624311.1	calponin-like protein
	AJ625726.1	calponin-like protein
	AJ626099.1	calponin-like protein
	AJ625824.1	calmodulin-like protein
	AJ516842.1	calmodulin
	AJ624059.1	calmodulin
	AJ624592.1	calmodulin
	CD646676.1	UF_105_N09_T7 Crassostrea virginica Gonad Crassostrea virginica cDNA 5- similar to thymosin beta-4 precursor - rat (fragment), mRNA sequence Accession: CD646676.1
	CX069120.1	EST360 subtracted libraries from oysters exposed to hypoxia Crassostrea gigas cDNA similar to Matrilin 1, cartilage matrix protein 1, mRNA sequence GenBank: CX069120.1
	AJ625256.1	matrilinisoform cra_b
	AJ624361.1	matrilin-4-like protein
	AJ624562.1	matrilin 2
	AF075697.1	Crassostrea gigas collagen receptor related protein mRNA, partial cds Accession:
	AJ623397.1	alpha 3 type vi collagen isoform 1 precursor
	AJ624353.1	alpha 3 type vi collagen isoform 1 precursor
	AJ623789.1	1-Precollagen-P
	AJ516839.1	procollagen type iv alpha 5
	AJ624226.1	precollagen d
	AJ626069.1	collagen type xii alpha 1
	AJ626467.1	collagen alpha-1chain precursor
	CX069206.1	EST446 subtracted libraries from oysters exposed to hypoxia Crassostrea gigas cDNA similar to peritrophin, mRNA sequence GenBank: CX069206.1
	CX069229.1	EST469 subtracted libraries from oysters exposed to hypoxia Crassostrea gigas cDNA similar to hemicentin; fibulin 6, mRNA sequence GenBank: CX069229.1
	CX069292.1	EST532 subtracted libraries from oysters exposed to hypoxia Crassostrea gigas cDNA similar to TFP250 fibrillin, mRNA sequence GenBank: CX069292.1
	CX069339.1	EST579 subtracted libraries from oysters exposed to hypoxia Crassostrea gigas cDNA similar to cofilin [MIPS], mRNA sequence GenBank: CX069339.1
	AJ516626.1	kinectin
	AJ625471	ficolin (collagen fibrinogen domain containing lectin) 2
	AJ516640.1	ficolin b
	AJ625200.1	ficolin b
	AJ625570.1	ficolin a
	AJ626034.1	ficolin 4
Proteolysis	JX117901..11	Crassostrea virginica cathepsin L-like cysteine proteinase (Cath L) mRNA, partial cds 253 bp linear mRNA Accession: JX117901.1
	EU437741.1	Crassostrea virginica cathepsin L mRNA, partial cds 414 bp linear mRNA Accession: EU437741.1
	EU437742.1	Crassostrea virginica cathepsin Z mRNA, partial cds 374 bp linear mRNA Accession: EU437742.1
	EU583801.1	Crassostrea gigas serine protease inhibitor mRNA, partial cds 823 bp linear mRNA Accession: EU583801.1
	JF919320.1	Crassostrea ariakensis clone Ca25 serine protease inhibitor-like protein mRNA, partial cds 430 bp linear mRNA Accession: JF919320.1
	JQ027693.1	Crassostrea angulata follistatin-like protein 1 mRNA,
	DQ263745.1	Mytilus edulis trypsin mRNA, partial cds 551 bp linear mRNA Accession: DQ263745.1
	DQ176012.1	Mytilus edulis serine-protease mRNA, partial cds 549 bp linear mRNA Accession: DQ176012.1
	DQ176011.1	Mytilus edulis elastase protein mRNA, partial cds 567 bp linear mRNA Accession: DQ176011.1
	AY618311.2	Mytilus galloprovincialis cathepsin L mRNA, partial cds 497 bp linear mRNA Accession: AY618311.2
	AJ624491.1	trypsin-like proteinase
	AJ624548.1	trypsin-like enzyme
	AJ625769.1	proprotein convertase subtilisin kexin type 1
	AJ516664.1	proteasomebeta1
	AJ624144.1	proteasomebeta type 5
	AJ625307.1	proteasomealpha type 5
	AJ625261.1	proteasomealpha type 2
	AJ624045.1	proteasome26snon-2
	AJ624573.1	proteasome26snon-12
	AJ516775.1	proteasome26snon-10
	AJ625898.1	proteasome z subunit
	AJ624459.1	proteasome 26s non-atpase subunit 8
Pumps	AY673964.1	Mytilus galloprovincialis amiloride-sensitive epithelial sodium channel gamma-like mRNA, partial sequence
	AY673963.1	Mytilus galloprovincialis amiloride-sensitive epithelial sodium channel beta-like mRNA, partial sequence
	AY673962.1	Mytilus galloprovincialis amiloride-sensitive epithelial sodium channel alpha-like mRNA, partial sequence
	DQ174102.1	Mytilus edulis NA/K-ATPase alpha subunit mRNA, partial cds 573 bp linear mRNA Accession: DQ174102.1
	DQ159885.1	Mytilus galloprovincialis GABA-a receptor 3-like protein mRNA, partial cds 383 bp linear mRNA Accession: DQ159885.1
Lysosomal activity	AY551099.1	Crassostrea gigas ATPase H+ transporting lysosomal protein mRNA,
	EU339935.1	Mytilus galloprovincialis lysosomal beta-glucuronidase mRNA,
	EU339934.1	Mytilus galloprovincialis lysosomal hexosaminidase mRNA,
	AJ623492.1	gm2 ganglioside activator protein
	AJ624405.1	gm2 ganglioside activator protein
	AJ624495.1	gm2 ganglioside activator protein
Metal resistance	AJ624882.1	ferritin
	AJ625268.1	ferritin
	AJ625847.1	isoform mt-10b
	AJ005453.1	Mytilus edulis mRNA for metallothionein MT 10 II 341 bp linear mRNA Accession: AJ005453.1
	AJ005451.1	Mytilus edulis mRNA for metallothionein MT 10 Ia 352 bp linear mRNA Accession: AJ005451.1
	AJ005456.1	Mytilus edulis mRNA for metallothionein MT 20 II 555 bp linear mRNA Accession: AJ005456.1
	AJ005455.1	Mytilus edulis mRNA for metallothionein MT 10 IV, partial sequence 258 bp linear mRNA Accession: AJ005455.1
	AJ005454.1	Mytilus edulis mRNA for metallothionein MT 10 III 334 bp linear mRNA Accession: AJ005454.1
	EF140766.1	Mytilus sp. KL-2006 metallothionein 20-II mRNA, complete cds 381 bp linear mRNA Accession: EF140766.1
	AJ005452.1	Mytilus edulis mRNA for metallothionein MT 10 Ib 342 bp linear mRNA Accession: AJ005452.1
	AJ007506.1	Mytilus edulis mRNA for metallothionein 10IV 396 bp linear mRNA Accession: AJ007506.1
	AY566247.1	Mytilus galloprovincialis metallothionein 20-IV (MT-20-IV) mRNA, complete cds 449 bp linear mRNA Accession: AY566247.1
	EF140765.1	Mytilus sp. KL-2006 metallothionein 10 mRNA, complete cds 266 bp linear mRNA Accession: EF140765.1
	DQ848984.1	Mytilus galloprovincialis metallothionein-10B mRNA, partial cds 201 bp linear mRNA Accession: DQ848984.1
Adhesion to substrate	FN869562.1	Mytilus galloprovincialis mRNA for fibrinogen-related protein 5
	FN869561.1	Mytilus galloprovincialis mRNA for fibrinogen-related protein 4
	FN869560.1	Mytilus galloprovincialis mRNA for fibrinogen-related protein 3
	FN869559.1	Mytilus galloprovincialis mRNA for fibrinogen-related protein 2 (FREP2 gene) 829 bp linear mRNA Accession: FN869559.1
	FN869558.1	Mytilus galloprovincialis mRNA for fibrinogen-related protein 1 (FREP1 gene) 787 bp linear mRNA Accession: FN869558.1
	FN869564.1	Mytilus galloprovincialis mRNA for fibrinogen-related protein 7 (FREP7 gene)944 bp linear mRNA Accession: FN869564.1
	FN869563.1	Mytilus galloprovincialis mRNA for fibrinogen-related protein 6 (FREP6 gene) 874 bp linear mRNA Accession: FN869563.1
	KC994890.1	Mytilus galloprovincialis Toll interacting protein mRNA, complete cds 1,785 bp linear mRNA Accession: KC994890.1
	JQ863366.1	Mytilus galloprovincialis c-type lysozyme mRNA, complete cds 529 bp linear mRNA Accession: JQ863366.1
	HQ236407.1	Mytilus galloprovincialis fibrinogen-related protein (FREP_G3) mRNA, complete cds 929 bp linear mRNA Accession: HQ236407.1
	HQ236406.1	Mytilus galloprovincialis fibrinogen-related protein (FREP_G2) mRNA, complete cds 806 bp linear mRNA Accession: HQ236406.1
	HQ236405.1	Mytilus galloprovincialis fibrinogen-related protein (FREP_G3.2) mRNA, partial cds 460 bp linear mRNA Accession: HQ236405.1
	HQ236404.1	Mytilus galloprovincialis fibrinogen-related protein (FREP_G3.1) mRNA, complete cds 925 bp linear mRNA Accession: HQ236404.1
	HQ236403.1	Mytilus galloprovincialis fibrinogen-related protein (FREP_G2.4) mRNA, complete cds 776 bp linear mRNA Accession: HQ236403.1
	HQ236402.1	Mytilus galloprovincialis fibrinogen-related protein (FREP_G2.3) mRNA, complete cds 771 bp linear mRNA Accession: HQ236402.1
	HQ236401.1	Mytilus galloprovincialis fibrinogen-related protein (FREP_G2.2) mRNA, complete cds 776 bp linear mRNA Accession: HQ236401.1
	HQ236400.1	Mytilus galloprovincialis fibrinogen-related protein (FREP_G2.1) mRNA, partial cds 634 bp linear mRNA Accession: HQ236400.1
	HQ236399.1	Mytilus galloprovincialis fibrinogen-related protein (FREP_G1.8) mRNA, complete cds 853 bp linear mRNA Accession: HQ236399.1
	HQ236398.1	Mytilus galloprovincialis fibrinogen-related protein (FREP_G1.7) mRNA, partial cds 570 bp linear mRNA Accession: HQ236398.1
	HQ236397.1	Mytilus galloprovincialis fibrinogen-related protein (FREP_G1.6) mRNA, partial cds 759 bp linear mRNA Accession: HQ236397.1
	HQ236396.1	Mytilus galloprovincialis fibrinogen-related protein (FREP_G1.5) mRNA, partial cds814 bp linear mRNA Accession: HQ236396.1
	HQ236395.1	Mytilus galloprovincialis fibrinogen-related protein (FREP_G1.4) mRNA, partial cds 802 bp linear mRNA Accession: HQ236395.1
	HQ236394.1	Mytilus galloprovincialis fibrinogen-related protein (FREP_G1.3) mRNA, complete cds 726 bp linear mRNA Accession: HQ236394.1
	HQ236393.1	Mytilus galloprovincialis fibrinogen-related protein (FREP_G1.2) mRNA, complete cds 720 bp linear mRNA Accession: HQ236393.1
	HQ236392.1	Mytilus galloprovincialis fibrinogen-related protein (FREP_G1.1) mRNA, complete cds 720 bp linear mRNA Accession: HQ236392.1
	BK007886.1	TPA_inf: Mytilus californianus fibrinogen-related protein 7 mRNA, complete cds 958 bp linear mRNA Accession: BK007886.1
	BK007885.1	Mytilus californianus fibrinogen-related protein 3 mRNA, complete cds 795 bp linear mRNA Accession: BK007885.1
	BK007884.1	Mytilus californianus fibrinogen-related protein 2 mRNA, complete cds 844 bp linear mRNA Accession: BK007884.1
	BK007883.1	Mytilus californianus fibrinogen-related protein 1 mRNA, complete cds825 bp linear mRNA Accession: BK007883.1
	HM147144.1	Mytilus edulis fibrinogen-related protein 2 precursor, mRNA, complete cds 835 bp linear mRNA Accession: HM147144.1
	HM147143.1	Mytilus edulis fibrinogen-related protein 1 precursor, mRNA, complete cds816 bp linear mRNA Accession: HM147143.1
	EF080942.1	Mytilus galloprovincialis putative contactin-associated protein mRNA, partial cds 722 bp linear mRNA Accession: EF080942.1
	AY845260.1	Mytilus edulis clone 2 foot protein 2 (fp-2) mRNA, complete cds 1,527 bp linear mRNA Accession: AY845260.1
	D43794.1	Mytilus galloprovincialis mRNA for adhesive plaque matrix protein, complete cds 1,489 bp linear mRNA Accession: D43794.1
	D43794.1	Mytilus galloprovincialis mRNA for adhesive plaque matrix protein, complete cds 1,489 bp linear mRNA Accession: D43794.1
	AY845260.1	Mytilus edulis clone 2 foot protein 2 (fp-2) mRNA, complete cds 1,527 bp linear mRNA Accession: AY845260.1
	EF080942.1	Mytilus galloprovincialis putative contactin-associated protein mRNA, partial cds 722 bp linear mRNA Accession: EF080942.1
	AY845262.1	Mytilus edulis clone QTB10 foot protein 2 (fp-2) mRNA, complete cds 1,362 bp linear mRNA Accession: AY845262.1
	AY845261.1	Mytilus edulis clone 7 foot protein 2 (fp-2) mRNA, complete cds1,413 bp linear mRNA Accession: AY845261.1
	AB008202.1	Mytilus galloprovincialis mRNA for twitchin-like protein, partial cds 1,007 bp linear mRNA Accession: AB008202.1
	AJ516452.1	ependymin-related protein
	AJ623544.1	ependymin related protein-1 precursor
	AJ516442.1	ependymin related protein 1
	AJ516678.1	ependymin related protein 1
	AJ516802.1	ependymin related protein 1
	AJ623481.1	ependymin related protein 1
	AJ624470.1	ependymin related protein 1
