# Supplementary material for: Assessing the impact of Benzo[a]pyrene on Marine Mussels: Application of a novel targeted low density microarray complementing classical biomarker responses
Source: PLoS One. 2017 Jun 26;12(6):e0178460. doi: 10.1371/journal.pone.0178460 (PMC5484464; doi:10.1371/journal.pone.0178460)
Supplement: S3 Table — Additional information to Figs 1 and 3. (XLSX) [file pone.0178460.s006.xlsx]

## Sheet: Feuil1
Supplementary Table S3. M-Values of the 205 DEGs in gills tissues in at least one condition during the exsposure to B[a]P concentrations ( without B[a]P supply is considered as the reference). Additional information to Figure.1.
B[a]P 5
Process	Gene ID	Gene Name	Log2 fold change
DNA Metabolism
	AJ625479.1	guanine nucleotide binding2	-3.77103
Translation
	AJ624649.1	ribosomal protein l7a	-4.88223
	AJ624878.1	ribosomal protein S8	-3.01747
	AJ516444.1	ribosomal protein l23a	-2.5165
	AJ626199.1	ribosomal protein s3a	7.15064
	AJ624324.1	40s ribosomal protein s23	-2.39779
Mitochondrial activity
	KF220385.1	cox1_EL cytochrome c oxidase subunit 1	-3.79829
	KF220400.1	cox3_ES cytochrome c oxidase subunit 3	6.38289
	KF220405.1	nd5_ES NADH dehydrogenase subunit 5	4.00199
	KF220402.1	nd2_ES NADH dehydrogenase subunit 2 (nd2)	4.06088
Carbohydrate metabolism (28)
	EF570416.1	mannose-6-phosphate isomerase	-2.59971
	AY580274.1	phosphofructokinase	-2.60622
	AJ626213.1	glucose dehydrogenase	3.30383
Cytoskeleton
	AJ249991.1	myosin heavy chain	-2.72022
	AJ249993.1	catchin	-3.1264
	AJ624120.1	calponin-like protein	-2.68619
	CD646676.1	similar to thymosin beta-4 precursor	2.93527
Adhesion to substrate
	HQ236407.1	fibrinogen-related protein (FREP_G3)	2.48791
Phase I metabolism
	HQ234335.1	cytochrome P450	2.45825
B[a]P 50
DNA Metabolism
	HQ424449.1	caspase 2	1.45571
	HQ424450.1	caspase 8	1.54841
	KC545831.1	Bax inhibitor-1 protein	1.51004
	AJ516519.1	adp-ribosylation factor 1	1.28922
	AJ625243.1	delta-n p63 p73-like protein	-1.60738
	AJ625979.1	defender against cell death 1	1.5499
	AJ625479.1	guanine nucleotide binding2	-2.21244
	AJ516663.1	h2a histonemember z	-2.04785
Immune response
	JQ244771.1	goose-type lysozyme 2 mRNA	-1.5848
	EU678314.1	serine/threonine protein kinase 38 mRNA	-1.1301
	EU810204.1	mytilin D precursor	-2.03961
	AF162336.1	mytilin B antimicrobial peptide precursor	-1.54208
	KF110683.1	interleukine-1 receptor-associated kinase 1	1.97694
	FR873276.1	Mytilus galloprovincialis mRNA for mytimacin-3 485 bp linear mRNA Accession: FR873276.1	-1.27779
	KC413028.1	Mytilus galloprovincialis toll-like receptor T precursor, mRNA, complete cds 3,145 bp linear mRNA Accession: KC413028.1	-2.00181
	KC344670.1	Mytilus galloprovincialis toll-like receptor e precursor, mRNA, complete cds 3,055 bp linear mRNA Accession: KC344670.1	-1.3965
	JX173687.1	Mytilus galloprovincialis toll-like receptor b mRNA, complete cds 4,025 bp linear mRNA Accession: JX173687.1	-1.6071
	HQ127223.2	Mytilus galloprovincialis NF-kappaB transcription factor Rel mRNA, complete cds 2,604 bp linear mRNA Accession: HQ127223.2	-1.47334
	JX173690.1	Mytilus galloprovincialis toll-like receptor i mRNA, complete cds 2,149 bp linear mRNA Accession: JX173690.1	-1.27605
	KF110682.1	Mytilus galloprovincialis lipopolysaccharide-induced TNF factor 7 mRNA, complete cds1,620 bp linear mRNA Accession: KF110682.1	1.50506
	KF110680.1	Mytilus galloprovincialis lipopolysaccharide-induced TNF factor 5 mRNA, complete cds 1,269 bp linear mRNA Accession: KF110680.1	1.59329
	KF110679.1	Mytilus galloprovincialis lipopolysaccharide-induced TNF factor 4 mRNA, complete cds 1,563 bp linear mRNA Accession: KF110679.1	2.1074
	KF110677.1	Mytilus galloprovincialis lipopolysaccharide-induced TNF factor 2-c mRNA, complete cds2,482 bp linear mRNA Accession: KF110677.1	2.50216
	KF110676.1	Mytilus galloprovincialis lipopolysaccharide-induced TNF factor 2-b mRNA, complete cds 2,524 bp linear mRNA Accession: KF110676.1	2.82786
	KF110675.1	Mytilus galloprovincialis lipopolysaccharide-induced TNF factor 2-a mRNA, complete cds2,557 bp linear mRNA Accession: KF110675.1	1.86571
Translation
	AJ624426.1	ribosomal protein sa	-1.98558
	AJ624933.1	ribosomal protein s8	-2.2267
	AJ625366.1	ribosomal protein s7	-1.49725
	AJ624636.1	ribosomal protein s6	-1.48003
	AJ516873.1	ribosomal protein s5	-1.54204
	AJ624300.1	ribosomal protein s4	-1.16558
	AJ626403.1	ribosomal protein s3a	-1.78167
	AJ624271.1	ribosomal protein s28	-1.37973
	AJ625324.1	ribosomal protein s27a	-1.32343
	AJ626374.1	ribosomal protein s27-like	-1.22923
	AJ625495.1	ribosomal protein s27	-1.50395
	AJ626091.1	ribosomal protein s24	1.50371
	AJ625342.1	ribosomal protein s18	-1.70585
	AJ623665.1	ribosomal protein s15	-1.42244
	AJ624086.1	ribosomal protein s11	-2.8735
	AJ624698.1	ribosomal protein l8	-2.2301
	AJ624649.1	ribosomal protein l7a	-1.45434
	AJ624878.1	ribosomal protein l7	-1.38038
	AJ625411.1	ribosomal protein l4	-2.39618
	AJ623317.1	ribosomal protein l38	-1.33387
	AJ625805.1	ribosomal protein l37	-1.17251
	AJ516855.1	ribosomal protein l31	1.43571
	AJ624109.1	ribosomal protein l31	-2.80055
	AJ516392.1	ribosomal protein l28	-1.856
	AJ625928.1	ribosomal protein l27	-2.72435
	AJ516444.1	ribosomal protein l23a	-1.18562
	AJ626199.1	ribosomal protein l23a	3.89735
	AJ625376.1	ribosomal protein l22	-1.93144
	AJ624732.1	ribosomal protein l21	1.68272
	AJ516414.1	ribosomal protein l19	-1.88447
	AJ624925.1	ribosomal protein l15	-1.15738
	AJ624488.1	ribosomal protein l13a	-2.32612
	AJ624923.1	ribosomal protein l11	-1.32294
	AJ625528.1	ribosomal protein l10a	-1.32529
	AJ624324.1	40s ribosomal protein s23	-2.79259
	AJ626184.1	eukaryotic translation initiation factorsubunit 6 48kda	1.93515
	AJ624248.1	elongation factor 2	-1.24388
	AJ626184.1	eukaryotic translation initiation factorsubunit 6 48kda	1.93515
	AJ625678.1	eukaryotic translation initiation factorisoform 1 isoform 2	-2.54031
Oxydative stress response
	FM177867.1	SOD Mytilus galloprovincialis mRNA for superoxide dismutase (sod gene) GenBank: FM177867.1	-1.13075
	AJ624882.1	ferritin	1.48937
	AJ005451.1	Mytilus edulis mRNA for metallothionein MT 10 Ia 352 bp linear mRNA Accession: AJ005451.1	-2.73119
	EF140766.1	Mytilus sp. KL-2006 metallothionein 20-II mRNA, complete cds 381 bp linear mRNA Accession: EF140766.1	1.41484
Heat chock response
	JF803805.1	Mytilus galloprovincialis small heat shock protein 24.1 mRNA, complete cds 989 bp linear mRNA Accession: JF803805.1	1.90256
	AB180909.1	Mytilus galloprovincialis hsp70 mRNA for heat shock protein 70, complete cds 2,175 bp linear mRNA Accession: AB180909.1	1.41396
	DQ158076.1	Mytilus galloprovincialis heat shock protein 27 (HSP27) mRNA, partial cds 123 bp linear mRNA Accession: DQ158076.1	-1.64271
	AF172607.1	Mytilus edulis heat shock protein HSP70 (hsp70) mRNA, partial cds 570 bp linear mRNA Accession: AF172607.1	-1.65415
	AF172607.1	Mytilus edulis heat shock protein HSP70 (hsp70) mRNA, partial cds 570 bp linear mRNA Accession: AF172607.1	-1.65415
	DQ178175.1	Mytilus galloprovincialis cytosolic heat shock protein 70 mRNA, partial cds 688 bp linear mRNA Accession: DQ178175.1	1.8362
	EF140763.1	Mytilus sp. KL-2006 heat shock protein 90 mRNA, partial cds 285 bp linear mRNA Accession: EF140763.1	-1.22014
	AB262086.1	Crassostrea gigas CRT mRNA for calreticulin, complete cds 1,727 bp linear mRNA Accession: AB262086.1	-1.20135
Phase I metabolism
	JX885879.1	Mytilus edulis cytochrome P450 family 1-like 2 protein (CYP1L2) mRNA, partial cds 1,433 bp linear mRNA Accession: JX885879.1	-1.30984
	AB479539.1	Mytilus edulis Cyp3A1 mRNA for Cyp3A-like isoform 1, complete cds 1,906 bp linear mRNA Accession: AB479539.1	-1.68873
	AF527010.1	Mytilus galloprovincialis glutathione S-transferase GSTpi1 mRNA, complete cds GenBank: AF527010.1	-2.61722
	HE599220.1	Mytilus galloprovincialis mRNA for ATP-binding cassette sub-family G member 2-like (abcg2 gene)	-1.21861
	HQ234335.1	Venerupis philippinarum cytochrome P450 mRNA, complete	-2.54685
Endocrine disruptors
	AJ625081.1	hydroxysteroid dehydrogenase like 2	-2.38392
	AJ624753.1	juvenile hormone diol kinase	-1.36973
Mitochondrial activity
	KF220403.1	Mytilus trossulus isolate nd3_ES NADH dehydrogenase subunit 3 (nd3) mRNA, partial cds; mitochondrial	1.40259
	KF220389.1	Mytilus trossulus isolate nd1_EL NADH dehydrogenase subunit 1 (nd1) mRNA, partial cds; mitochondrial	2.19588
	KF220400.1	Mytilus trossulus isolate cox3_ES cytochrome c oxidase subunit 3 (cox3) mRNA, partial cds; mitochondrial	4.30427
	AJ626427.1	3-hydroxyisobutyrate dehydrogenase	-2.08914
	AJ624775.1	mitochondrial aldehyde dehydrogenase 2	2.80995
	AJ624828.1	dihydrouridine synthase 3-like	2.10504
	AJ624828.1	dihydrouridine synthase 3-like	2.10504
	HE599220.1	Mytilus galloprovincialis mRNA for ATP-binding cassette sub-family G member 2-like (abcg2 gene) 2,129 bp linear mRNA Accession: HE599220.1	-1.21861
	AJ624584.1	cytochrome b	1.36572
	AJ516636.1	cytochrome c oxidase subunit via polypeptide 1	-1.48232
	AJ624079.1	cytochrome c oxidase subunit iv	1.52074
	KF220405.1	Mytilus trossulus isolate nd5_ES NADH dehydrogenase subunit 5 (nd5) mRNA, partial cds; mitochondrial	2.04881
	KF220403.1	Mytilus trossulus isolate nd3_ES NADH dehydrogenase subunit 3 (nd3) mRNA, partial cds; mitochondrial	1.40259
	KF220402.1	Mytilus trossulus isolate nd2_ES NADH dehydrogenase subunit 2 (nd2) mRNA, partial cds; mitochondrial 513 bp linear mRNA Accession: KF220402.1	2.53989
	KF220401.1	Mytilus trossulus isolate nd1_ES NADH dehydrogenase subunit 1 (nd1) mRNA, partial cds; mitochondrial 1,059 bp linear mRNA Accession: KF220401.1	1.65577
	KF220391.1	Mytilus trossulus isolate nd3_EL NADH dehydrogenase subunit 3 (nd3) mRNA, partial cds; mitochondrial	1.3898
	KF220390.1	Mytilus trossulus isolate nd2_EL NADH dehydrogenase subunit 2 (nd2) mRNA, partial cds; mitochondrial	1.97697
	KF220389.1	Mytilus trossulus isolate nd1_EL NADH dehydrogenase subunit 1 (nd1) mRNA, partial cds; mitochondrial	2.19588
	EU152923.1	Crassostrea gigas clone 40 NADH dehydrogenase 4L-like mRNA, complete sequence; mitochondrial 389 bp linear mRNA Accession: EU152923.1	-1.53882
	KF220388.1	Mytilus trossulus isolate cytb_EL cytochrome b (cytb) mRNA, partial cds; mitochondrial 468 bp linear mRNA Accession: KF220388.1	1.27409
Carbohydrate metabolism
	AJ624340.1	mitochondrial cytochrome c oxidase subunit 5b isoform 1	-2.57529
	AJ516895.1	mitochondrial cytochrome c oxidase subunit 4	-2.86628
	AJ624528.1	mitochondrial atp synthase gamma-subunit	2.37604
	EF570417.1	Mytilus edulis mannose-6-phosphate isomerase (MPI-B) mRNA, partial cds 1,277 bp linear mRNA Accession: EF570417.1	-1.60086
	EF570416.1	Mytilus edulis mannose-6-phosphate isomerase (MPI-A) mRNA, partial cds 1,315 bp linear mRNA Accession: EF570416.1	-2.57658
	AJ625051.1	chitinase 1	-1.76287
	AY580261.1	Mytilus californianus phosphofructokinase mRNA, partial cds 507 bp linear mRNA Accession: AY580261.1	-1.96572
	AJ624743.1	acetyl-coenzyme a acyltransferase 1	-1.4479
	AJ625322.1	glucose-methanol-choline oxidoreductase	-1.80402
	AJ626213.1	glucose dehydrogenase	2.59321
	AJ624681.1	gdp-l-fucose:beta-d-galactoside 2-alpha-1-fucosyltransferase	1.55723
Cytoskeleton
	HQ690238.1	Mytilus edulis beta-tubulin mRNA, partial cds GenBank: HQ690238.1	1.60044
	HM537081.1	Mytilus galloprovincialis alpha-tubulin mRNA, partial cds GenBank: HM537081.1	1.80983
	AF172606.1	Mytilus edulis actin mRNA, partial cds GenBank: AF172606.1	-1.37168
	AB052656.1	Mytilus galloprovincialis mRNA for calponin-like protein, complete cds GenBank: AB052656.1	-2.04949
	AJ249991.1	Mytilus galloprovincialis partial mRNA for myosin heavy chain (MHC gene), from catch muscle 5,545 bp linear mRNA Accession: AJ249991.1	-2.02688
	AJ624120.1	calponin-like protein	-1.87649
	AJ624311.1	calponin-like protein	-1.24092
	AJ626099.1	calponin-like protein	1.62175
	AJ624059.1	calmodulin	-1.33687
	CD646676.1	UF_105_N09_T7 Crassostrea virginica Gonad Crassostrea virginica cDNA 5- similar to thymosin beta-4 precursor - rat (fragment), mRNA sequence Accession: CD646676.1	2.64122
	AJ623789.1	1-Precollagen-P	-1.51422
	AJ626069.1	collagen type xii alpha 1	1.50485
Proteolysis
	EU437742.1	Crassostrea virginica cathepsin Z mRNA, partial cds 374 bp linear mRNA Accession: EU437742.1	-1.28966
	EU583801.1	Crassostrea gigas serine protease inhibitor mRNA, partial cds 823 bp linear mRNA Accession: EU583801.1	-1.7949
	JQ027693.1	Crassostrea angulata follistatin-like protein 1 mRNA, complete cds 1,297 bp linear mRNA Accession: JQ027693.1	1.37342
	AJ624548.1	trypsin-like enzyme	1.67444
	AJ625261.1	proteasomealpha type 2	-1.87741
	AJ624573.1	proteasome26snon-12	2.27098
	AJ516775.1	proteasome26snon-10	-2.56962
Pumps
	AY673963.1	Mytilus galloprovincialis amiloride-sensitive epithelial sodium channel beta-like mRNA, partial sequence	-1.36217
Lysosomal activity
	AJ624495.1	gm2 ganglioside activator protein	1.34653
Adhesion to substrate
	FN869561.1	Mytilus galloprovincialis mRNA for fibrinogen-related protein 4 (FREP4 gene) 762 bp linear mRNA Accession: FN869561.1	1.48789
	FN869559.1	Mytilus galloprovincialis mRNA for fibrinogen-related protein 2 (FREP2 gene) 829 bp linear mRNA Accession: FN869559.1	1.74847
	HQ236407.1	Mytilus galloprovincialis fibrinogen-related protein (FREP_G3) mRNA, complete cds 929 bp linear mRNA Accession: HQ236407.1	3.69666
	EF080942.1	Mytilus galloprovincialis putative contactin-associated protein mRNA, partial cds 722 bp linear mRNA Accession: EF080942.1	2.2223
	D43794.1	Mytilus galloprovincialis mRNA for adhesive plaque matrix protein, complete cds 1,489 bp linear mRNA Accession: D43794.1	-2.30479
	D43794.1	Mytilus galloprovincialis mRNA for adhesive plaque matrix protein, complete cds 1,489 bp linear mRNA Accession: D43794.1	-2.30479
	EF080942.1	Mytilus galloprovincialis putative contactin-associated protein mRNA, partial cds 722 bp linear mRNA Accession: EF080942.1	2.2223
	AY845262.1	Mytilus edulis clone QTB10 foot protein 2 (fp-2) mRNA, complete cds 1,362 bp linear mRNA Accession: AY845262.1	1.27517
B[a]P 100
DNA Metabolism
	KC545831.1	Bax inhibitor-1 protein (BI1)	1.48336
	AF227976.1	Mytilus edulis topoisomerase II mRNA, partial cds GenBank: AF227976.1	-1.54011
	AJ624686.1	dna ligase i	-2.27372
	AJ516519.1	adp-ribosylation factor 1	-0.996822
	AJ625479.1	guanine nucleotide binding2	-4.40328
	AJ516600.1	h3family 3b	1.2572
	AJ626239.1	member ras oncogene family	1.363
	AF227976.1	Mytilus edulis topoisomerase II mRNA, partial cds GenBank: AF227976.1	-1.54011
Immune response
	JQ244771.1	goose-type lysozyme 2 mRNA	-1.70733
	JX185069.1	isolate YT24 goose-type lysozyme 1 mRNA	1.56261
	EU810204.1	mytilin D precursor	1.29845
	AF162336.1	mytilin B antimicrobial peptide precursor	-1.49072
	KF110683.1	interleukine-1 receptor-associated kinase 1	1.92717
	FR873274.1	Mytilus galloprovincialis mRNA for mytimacin-1 633 bp linear mRNA Accession: FR873274.1	-0.97823
	KC994890.1	Mytilus galloprovincialis Toll interacting protein mRNA, complete cds1,785 bp linear mRNA Accession: KC994890.1	1.15761
	KC413028.1	Mytilus galloprovincialis toll-like receptor T precursor, mRNA, complete cds 3,145 bp linear mRNA Accession: KC413028.1	-2.03298
	KC413027.1	Mytilus galloprovincialis toll-like receptor S precursor, mRNA, complete cds 2,338 bp linear mRNA Accession: KC413027.1	1.26075
	KC357782.1	Mytilus galloprovincialis myeloid differentiation factor 88 c mRNA, complete cds 2,309 bp linear mRNA Accession: KC357782.1	1.1737
	KC344670.1	Mytilus galloprovincialis toll-like receptor e precursor, mRNA, complete cds 3,055 bp linear mRNA Accession: KC344670.1	-1.2432
	JX173687.1	Mytilus galloprovincialis toll-like receptor b mRNA, complete cds 4,025 bp linear mRNA Accession: JX173687.1	-1.83471
	AY551094.1	Crassostrea gigas cavortin mRNA, complete cds 778 bp linear mRNA Accession: AY551094.1	-1.41904
	KF051277.1	Mytilus galloprovincialis lipopolysaccharide-induced TNF factor 1 mRNA, complete cds 1,815 bp linear mRNA Accession: KF051277.1	1.75045
	KF110682.1	Mytilus galloprovincialis lipopolysaccharide-induced TNF factor 7 mRNA, complete cds1,620 bp linear mRNA Accession: KF110682.1	1.94574
	KF110680.1	Mytilus galloprovincialis lipopolysaccharide-induced TNF factor 5 mRNA, complete cds 1,269 bp linear mRNA Accession: KF110680.1	1.07881
	KF110679.1	Mytilus galloprovincialis lipopolysaccharide-induced TNF factor 4 mRNA, complete cds 1,563 bp linear mRNA Accession: KF110679.1	1.86731
	KF110678.1	Mytilus galloprovincialis lipopolysaccharide-induced TNF factor 3 mRNA, complete cds1,904 bp linear mRNA Accession: KF110678.1	-1.19316
	KF110677.1	Mytilus galloprovincialis lipopolysaccharide-induced TNF factor 2-c mRNA, complete cds2,482 bp linear mRNA Accession: KF110677.1	1.69909
	KF110675.1	Mytilus galloprovincialis lipopolysaccharide-induced TNF factor 2-a mRNA, complete cds2,557 bp linear mRNA Accession: KF110675.1	1.43126
	AJ625378.1	macrophage galactose n-acetyl-galactosamine specific lectin 2	-1.40739
Translation
	AJ625732.1	ribosomal proteinx-linked	-1.47969
	AJ624426.1	ribosomal protein sa	-2.22463
	AJ623948.1	ribosomal protein s9	-1.62887
	AJ624933.1	ribosomal protein s8	-1.3243
	AJ624636.1	ribosomal protein s6	-1.10826
	AJ516873.1	ribosomal protein s5	-1.25008
	AJ624271.1	ribosomal protein s28	-1.21864
	AJ626374.1	ribosomal protein s27-like	-1.67086
	AJ625495.1	ribosomal protein s27	-1.69678
	AJ626091.1	ribosomal protein s24	0.985189
	AJ625317.1	ribosomal protein s20	-1.69335
	AJ625342.1	ribosomal protein s18	-1.24162
	AJ623890.1	ribosomal protein s14	1.1955
	AJ626437.1	ribosomal protein s12	2.00932
	AJ624698.1	ribosomal protein l8	-1.09505
	AJ624649.1	ribosomal protein l7a	-5.45397
	AJ624878.1	ribosomal protein l7	-2.71934
	AJ625411.1	ribosomal protein l4	-3.59962
	AJ626463.1	ribosomal protein l35a	1.36966
	AJ516855.1	ribosomal protein l31	1.37656
	AJ624109.1	ribosomal protein l31	1.89393
	AJ625380.1	ribosomal protein l3	-1.27395
	AJ625928.1	ribosomal protein l27	-1.73355
	AJ625957.1	ribosomal protein l26	-2.04965
	AJ516444.1	ribosomal protein l23a	-3.17751
	AJ626199.1	ribosomal protein l23a	5.77738
	AJ625376.1	ribosomal protein l22	-1.54279
	AJ624503.1	ribosomal protein l17	-1.47766
	AJ624921.1	ribosomal protein l14	-1.01987
	AJ626296.1	ribosomal protein l12e	1.61425
	AJ625528.1	ribosomal protein l10a	-1.51727
	AJ625604.1	ribosomal protein l10	1.34194
	AJ624324.1	40s ribosomal protein s23	-1.56141
	AJ516364.1	eukaryotic translation elongation factor 1 beta 2	-1.70664
	AJ626406.1	eukaryotic translation initiation factorsubunit 9116kda	-1.28685
	AJ625678.1	eukaryotic translation initiation factorisoform 1 isoform 2	-2.0719
Oxydative stress response
	AJ005451.1	Mytilus edulis mRNA for metallothionein MT 10 Ia 352 bp linear mRNA Accession: AJ005451.1	-2.15819
	AJ005456.1	Mytilus edulis mRNA for metallothionein MT 20 II 555 bp linear mRNA Accession: AJ005456.1	-1.69081
	AJ005455.1	Mytilus edulis mRNA for metallothionein MT 10 IV, partial sequence 258 bp linear mRNA Accession: AJ005455.1	1.33266
	AJ005452.1	Mytilus edulis mRNA for metallothionein MT 10 Ib 342 bp linear mRNA Accession: AJ005452.1	1.14786
	AJ007506.1	Mytilus edulis mRNA for metallothionein 10IV 396 bp linear mRNA Accession: AJ007506.1	-0.995004
	DQ848984.1	Mytilus galloprovincialis metallothionein-10B mRNA, partial cds 201 bp linear mRNA Accession: DQ848984.1	1.20914
Heat chock response
	JF803804.1	Mytilus galloprovincialis small heat shock protein 22 mRNA, complete cds 962 bp linear mRNA Accession: JF803804.1	-1.16658
	AB180909.1	Mytilus galloprovincialis hsp70 mRNA for heat shock protein 70, complete cds 2,175 bp linear mRNA Accession: AB180909.1	1.06481
	AB180908.1	Mytilus galloprovincialis hsp70 mRNA for heat shock protein 70, complete cds 2,393 bp linear mRNA Accession: AB180908.1	1.41485
	DQ178175.1	Mytilus galloprovincialis cytosolic heat shock protein 70 mRNA, partial cds 688 bp linear mRNA Accession: DQ178175.1	1.75513
	AB262086.1	Crassostrea gigas CRT mRNA for calreticulin, complete cds 1,727 bp linear mRNA Accession: AB262086.1	-1.26936
Phase I metabolism
	AF072855.1	4/ Mytilus galloprovincialis cytochrome p450 CYP4Y1 mRNA, partial cds 447 bp linear mRNA Accession: AF072855.1	-1.0783
	AB479539.1	6/ Mytilus edulis Cyp3A1 mRNA for Cyp3A-like isoform 1, complete cds 1,906 bp linear mRNA Accession: AB479539.1	-1.20329
	EF645271.1	7/ Crassostrea gigas CYP356A1 (CYP356A1) mRNA, complete cds 1,627 bp linear mRNA Accession: EF645271.1	-1.432
	AF527010.1	Mytilus galloprovincialis glutathione S-transferase GSTpi1 mRNA, complete cds GenBank: AF527010.1	-2.60239
	HQ234335.1	Venerupis philippinarum cytochrome P450 mRNA, complete	-1.54685
Endocrine disruptors
	KC793981.1	Mytilus galloprovincialis vitellogenin mRNA, partial cds 347 bp linear mRNA Accession: KC793981.1	1.36211
	AB257133.2	Mytilus edulis MeER2 mRNA for estrogen receptor, complete cds 1,744 bp linear mRNA Accession: AB257133.2	-1.59254
	AB257132.2	Mytilus edulis MeER1 mRNA for estrogen receptor, complete cds 2,036 bp linear mRNA Accession: AB257132.2	-1.96259
	AJ625081.1	hydroxysteroid dehydrogenase like 2	-1.64064
Mitochondrial activity
	KF220403.1	Mytilus trossulus isolate nd3_ES NADH dehydrogenase subunit 3 (nd3) mRNA, partial cds; mitochondrial	1.22933
	KF220398.1	Mytilus trossulus isolate cox1_ES cytochrome c oxidase subunit 1 (cox1) mRNA, partial cds; mitochondrial	2.25104
	KF220385.1	Mytilus trossulus isolate cox1_EL cytochrome c oxidase subunit 1 (cox1) mRNA, partial cds; mitochondrial	-4.10871
	KF220400.1	Mytilus trossulus isolate cox3_ES cytochrome c oxidase subunit 3 (cox3) mRNA, partial cds; mitochondrial	2.91189
	AJ626427.1	3-hydroxyisobutyrate dehydrogenase	-1.36406
	AJ624828.1	dihydrouridine synthase 3-like	1.45531
	AJ624828.1	dihydrouridine synthase 3-like	1.45531
	AY580258.1	Mytilus californianus ATP synthase beta subunit mRNA, partial cds 1,044 bp linear mRNA Accession: AY580258.1	-1.20013
	KF220394.1	Mytilus trossulus isolate nd5_EL NADH dehydrogenase subunit 5 (nd5) mRNA, partial cds; mitochondrial	1.66509
	KF220405.1	Mytilus trossulus isolate nd5_ES NADH dehydrogenase subunit 5 (nd5) mRNA, partial cds; mitochondrial	3.46049
	KF220403.1	Mytilus trossulus isolate nd3_ES NADH dehydrogenase subunit 3 (nd3) mRNA, partial cds; mitochondrial	1.22933
	KF220402.1	Mytilus trossulus isolate nd2_ES NADH dehydrogenase subunit 2 (nd2) mRNA, partial cds; mitochondrial 513 bp linear mRNA Accession: KF220402.1	3.2485
	KF220392.1	Mytilus trossulus isolate nd4_EL NADH dehydrogenase subunit 4 (nd4) mRNA, partial cds; mitochondrial	1.79103
	KF220391.1	Mytilus trossulus isolate nd3_EL NADH dehydrogenase subunit 3 (nd3) mRNA, partial cds; mitochondrial	1.58393
	EU152923.1	Crassostrea gigas clone 40 NADH dehydrogenase 4L-like mRNA, complete sequence; mitochondrial 389 bp linear mRNA Accession: EU152923.1	-1.1298
	KF220388.1	Mytilus trossulus isolate cytb_EL cytochrome b (cytb) mRNA, partial cds; mitochondrial 468 bp linear mRNA Accession: KF220388.1	1.46107
	AJ516895.1	mitochondrial cytochrome c oxidase subunit 4	-2.54134
	AJ624528.1	mitochondrial atp synthase gamma-subunit	1.903
Carbohydrate metabolism
	EF570417.1	Mytilus edulis mannose-6-phosphate isomerase (MPI-B) mRNA, partial cds 1,277 bp linear mRNA Accession: EF570417.1	-2.223
	EF570416.1	Mytilus edulis mannose-6-phosphate isomerase (MPI-A) mRNA, partial cds 1,315 bp linear mRNA Accession: EF570416.1	-2.1998
	AJ625778.1	chitinase	1.00623
	AJ624637.1	chitinase	1.09387
	AJ624087.1	chitinase b precursor	2.93952
	AY580274.1	Mytilus edulis phosphofructokinase mRNA, partial cds 516 bp linear mRNA Accession: AY580274.1	-1.27463
	AY580261.1	Mytilus californianus phosphofructokinase mRNA, partial cds 507 bp linear mRNA Accession: AY580261.1	-1.44949
	AJ624743.1	acetyl-coenzyme a acyltransferase 1	-1.98181
	AJ625322.1	glucose-methanol-choline oxidoreductase	-2.20255
	AJ624681.1	gdp-l-fucose:beta-d-galactoside 2-alpha-1-fucosyltransferase	1.64248
Cytoskeleton
	HQ678184.1	Mytilus edulis putative beta-tubulin mRNA, partial cds GenBank: HQ678184.1	1.96891
	AB052656.1	Mytilus galloprovincialis mRNA for calponin-like protein, complete cds GenBank: AB052656.1	-2.05198
	AJ249991.1	Mytilus galloprovincialis partial mRNA for myosin heavy chain (MHC gene), from catch muscle 5,545 bp linear mRNA Accession: AJ249991.1	-1.75014
	AJ249993.1	Mytilus galloprovincialis mRNA for catchin (catchin gene) 3,530 bp linear mRNA Accession: AJ249993.1	-1.2725
	AJ626386.1	actin binding protein	-3.22232
	AJ624120.1	calponin-like protein	-2.23249
	AJ624311.1	calponin-like protein	-1.0815
	AJ625824.1	calmodulin-like protein	-1.7439
	AJ624059.1	calmodulin	-1.11784
	AJ624592.1	calmodulin	1.25955
	AJ624562.1	matrilin 2	-1.2172
	AJ516626.1	kinectin	-1.77834
Proteolysis
	EU583801.1	Crassostrea gigas serine protease inhibitor mRNA, partial cds 823 bp linear mRNA Accession: EU583801.1	-2.17023
	JF919320.1	Crassostrea ariakensis clone Ca25 serine protease inhibitor-like protein mRNA, partial cds 430 bp linear mRNA Accession: JF919320.1	1.77469
	JQ027693.1	Crassostrea angulata follistatin-like protein 1 mRNA, complete cds 1,297 bp linear mRNA Accession: JQ027693.1	1.1011
	AJ624548.1	trypsin-like enzyme	1.38416
	AJ516775.1	proteasome26snon-10	-1.47633
	AJ624459.1	proteasome 26s non-atpase subunit 8	-1.05798
Pumps
	AY673963.1	Mytilus galloprovincialis amiloride-sensitive epithelial sodium channel beta-like mRNA, partial sequence	-1.79809
	AY673962.1	Mytilus galloprovincialis amiloride-sensitive epithelial sodium channel alpha-like mRNA, partial sequence	1.20218
Lysosomal activity
	EU339935.1	Mytilus galloprovincialis lysosomal beta-glucuronidase mRNA, partial cds 553 bp linear mRNA Accession: EU339935.1	-1.52185
	AJ624495.1	gm2 ganglioside activator protein	1.26389
Adhesion to substrate
	FN869559.1	Mytilus galloprovincialis mRNA for fibrinogen-related protein 2 (FREP2 gene) 829 bp linear mRNA Accession: FN869559.1	1.55941
	KC994890.1	Mytilus galloprovincialis Toll interacting protein mRNA, complete cds 1,785 bp linear mRNA Accession: KC994890.1	1.15761
	HQ236407.1	Mytilus galloprovincialis fibrinogen-related protein (FREP_G3) mRNA, complete cds 929 bp linear mRNA Accession: HQ236407.1	1.92442
	HQ236401.1	Mytilus galloprovincialis fibrinogen-related protein (FREP_G2.2) mRNA, complete cds 776 bp linear mRNA Accession: HQ236401.1	-1.20335
	HQ236396.1	Mytilus galloprovincialis fibrinogen-related protein (FREP_G1.5) mRNA, partial cds814 bp linear mRNA Accession: HQ236396.1	-0.982648
	HM147143.1	Mytilus edulis fibrinogen-related protein 1 precursor, mRNA, complete cds816 bp linear mRNA Accession: HM147143.1	-1.37506
	EF080942.1	Mytilus galloprovincialis putative contactin-associated protein mRNA, partial cds 722 bp linear mRNA Accession: EF080942.1	1.24082
	AY845260.1	Mytilus edulis clone 2 foot protein 2 (fp-2) mRNA, complete cds 1,527 bp linear mRNA Accession: AY845260.1	1.11311
	D43794.1	Mytilus galloprovincialis mRNA for adhesive plaque matrix protein, complete cds 1,489 bp linear mRNA Accession: D43794.1	-1.89395
	D43794.1	Mytilus galloprovincialis mRNA for adhesive plaque matrix protein, complete cds 1,489 bp linear mRNA Accession: D43794.1	-1.89395
	AY845260.1	Mytilus edulis clone 2 foot protein 2 (fp-2) mRNA, complete cds 1,527 bp linear mRNA Accession: AY845260.1	1.11311
	EF080942.1	Mytilus galloprovincialis putative contactin-associated protein mRNA, partial cds 722 bp linear mRNA Accession: EF080942.1	1.24082
	AB008202.1	Mytilus galloprovincialis mRNA for twitchin-like protein, partial cds 1,007 bp linear mRNA Accession: AB008202.1	-1.0397
	AJ516452.1	ependymin-related protein	-1.94056
	AJ623544.1	ependymin related protein-1 precursor	-1.58835
