# Supplementary material for: Assessing the impact of Benzo[a]pyrene on Marine Mussels: Application of a novel targeted low density microarray complementing classical biomarker responses
Source: PLoS One. 2017 Jun 26;12(6):e0178460. doi: 10.1371/journal.pone.0178460 (PMC5484464; doi:10.1371/journal.pone.0178460)
Supplement: S4 Table — Additional information to Figs 2 and 4. (XLSX) [file pone.0178460.s007.xlsx]

## Sheet: Feuil1
Supplementary Table S4. M-Values of the 109 DEGs indigestive gland tissues in at least one condition during the exsposure to B[a]P concentrations ( without B[a]P supply is considered as the reference). Additional information to Figure.1.
B[a]P 5
Process	Gene ID	Gene Name	Log2 fold change
Immune response	KC357778.1	Mytilus galloprovincialis toll-like receptor k mRNA, complete cds 3,905 bp linear mRNA Accession: KC357778.1	0.999927
	AJ625378.1	macrophage galactose n-acetyl-galactosamine specific lectin 2	1.98911
Phase I metabolism	JX885882.1	Mytilus edulis cytochrome P450 family 3-like 3 protein (CYP3L3) mRNA, partial cds 1,614 bp linear mRNA Accession: JX885882.1	2.00294
Carbohydrate metabolism	EF570417.1	Mytilus edulis mannose-6-phosphate isomerase (MPI-B) mRNA, partial cds 1,277 bp linear mRNA Accession: EF570417.1	2.21044
Cytoskeleton	AJ624311.1	calponin-like protein	3.43334
	AF075697.1	Crassostrea gigas collagen receptor related protein mRNA, partial cds Accession:	1.14039
Proteolysis	AJ625898.1	proteasome z subunit	-0.91673
Oxydative stress	AJ005451.1	Mytilus edulis mRNA for metallothionein MT 10 Ia 352 bp linear mRNA Accession: AJ005451.1	3.22369
	AJ005456.1	Mytilus edulis mRNA for metallothionein MT 20 II 555 bp linear mRNA Accession: AJ005456.1	0.857223
B[a]P 50
DNA Metabolism	DQ865150.1	p63/73-like protein	-1.28894
	DQ060436.1	delta-N p63/p73-like protein mRNA	-1.52705
	HQ424450.1	caspase 8 mRNA	1.93785
	AJ623737.1	Mytilus galloprovincialis haemolymph, cDNA clone gadd45a (Growth Arrest and DNA Damage or gadd45) /GPPD01946, mRNA sequence GenBank: AJ623737.1	1.7967
	AJ516519.1	adp-ribosylation factor 1	-2.0915
	AJ625979.1	defender against cell death 1	-1.11285
	AY579472.1	Mytilus edulis p53 tumor suppressor-like protein mRNA, complete cds 2,276 bp linear mRNA Accession: AY579472.1	-2.5777
	AJ625027.1	member ras oncogene family	1.58466
Immune response	AF334665.1	lysozyme mRNA	1.46964
	JQ244771.1	goose-type lysozyme 2 mRNA	1.43117
	KF110683.1	interleukine-1 receptor-associated kinase 1	-1.83951
	KC994890.1	Mytilus galloprovincialis Toll interacting protein mRNA, complete cds1,785 bp linear mRNA Accession: KC994890.1	-2.0022
	AJ624460.1	cyclophilin a	3.39803
	KF051277.1	Mytilus galloprovincialis lipopolysaccharide-induced TNF factor 1 mRNA, complete cds 1,815 bp linear mRNA Accession: KF051277.1	-1.35963
	KF110680.1	Mytilus galloprovincialis lipopolysaccharide-induced TNF factor 5 mRNA, complete cds 1,269 bp linear mRNA Accession: KF110680.1	-1.23066
Translation	AJ623665.1	ribosomal protein s15	-1.56997
	AJ625957.1	ribosomal protein l26	-2.38968
	AJ624503.1	ribosomal protein l17	-1.05983
	AJ626184.1	eukaryotic translation initiation factorsubunit 6 48kda	-1.86213
Oxydatif stress response	AJ624882.1	ferritin	-1.51342
Heat chock response	DQ178174.1	Mytilus galloprovincialis cytosolic heat shock protein 70 mRNA, partial cds 682 bp linear mRNA Accession: DQ178174.1	1.77021
Mitochondrial activity	KF220389.1	Mytilus trossulus isolate nd1_EL NADH dehydrogenase subunit 1 (nd1) mRNA, partial cds; mitochondrial	-2.01665
	AJ624828.1	dihydrouridine synthase 3-like	-1.45238
	KF220394.1	Mytilus trossulus isolate nd5_EL NADH dehydrogenase subunit 5 (nd5) mRNA, partial cds; mitochondrial	-1.63216
Carbohydrate metabolism	AJ625051.1	chitinase 1	-2.29675
	AJ625142.1	glyceraldehyde-3-phosphate dehydrogenase	1.33514
	AJ624681.1	gdp-l-fucose:beta-d-galactoside 2-alpha-1-fucosyltransferase	-1.33929
Cytoskeleton	AJ625357.1	troponin i	-1.47106
	AJ626099.1	calponin-like protein	-1.42671
	CD646676.1	UF_105_N09_T7 Crassostrea virginica Gonad Crassostrea virginica cDNA 5- similar to thymosin beta-4 precursor - rat (fragment), mRNA sequence Accession: CD646676.1	-3.08487
	CX069120.1	EST360 subtracted libraries from oysters exposed to hypoxia Crassostrea gigas cDNA similar to Matrilin 1, cartilage matrix protein 1, mRNA sequence GenBank: CX069120.1	-1.33458
Adhesion to substrate	KC994890.1	Mytilus galloprovincialis Toll interacting protein mRNA, complete cds 1,785 bp linear mRNA Accession: KC994890.1	-2.0022
	HM147143.1	Mytilus edulis fibrinogen-related protein 1 precursor, mRNA, complete cds816 bp linear mRNA Accession: HM147143.1	1.47549
	EF080942.1	Mytilus galloprovincialis putative contactin-associated protein mRNA, partial cds 722 bp linear mRNA Accession: EF080942.1	-1.39348
B[a]P 100
DNA Metabolism	HQ424454.1	caspase 3/7-4 mRNA	1.54883
	AY679522.1	Mytilus edulis RAS mRNA, complete cds GenBank: AY679522.1	1.48539
	AJ625058.1	t-cell lymphoma invasion and metastasis 1	-1.78178
	AJ624686.1	dna ligase i	-2.45098
	AJ625479.1	guanine nucleotide binding2	-1.57629
	AJ626239.1	member ras oncogene family	1.53897
Immune response	EU810204.1	mytilin D precursor	-3.23326
	AF162336.1	mytilin B antimicrobial peptide precursor	-1.35269
	KF110683.1	interleukine-1 receptor-associated kinase 1	1.55748
	FR873276.1	Mytilus galloprovincialis mRNA for mytimacin-3 485 bp linear mRNA Accession: FR873276.1	-1.99832
	KC413028.1	Mytilus galloprovincialis toll-like receptor T precursor, mRNA, complete cds 3,145 bp linear mRNA Accession: KC413028.1	-1.43504
	JX173687.1	Mytilus galloprovincialis toll-like receptor b mRNA, complete cds 4,025 bp linear mRNA Accession: JX173687.1	-2.08792
	JX173690.1	Mytilus galloprovincialis toll-like receptor i mRNA, complete cds 2,149 bp linear mRNA Accession: JX173690.1	-1.20829
	AJ624460.1	cyclophilin a	2.35179
	KF110680.1	Mytilus galloprovincialis lipopolysaccharide-induced TNF factor 5 mRNA, complete cds 1,269 bp linear mRNA Accession: KF110680.1	1.3649
	KF110676.1	Mytilus galloprovincialis lipopolysaccharide-induced TNF factor 2-b mRNA, complete cds 2,524 bp linear mRNA Accession: KF110676.1	1.26691
Translation	AJ624426.1	ribosomal protein sa	-2.31808
	AJ623948.1	ribosomal protein s9	-2.07426
	AJ626403.1	ribosomal protein s3a	1.36806
	AJ624871.1	ribosomal protein s25	1.59662
	AJ624829.1	ribosomal protein s20	1.37153
	AJ624429.1	ribosomal protein s13	-1.92362
	AJ516855.1	ribosomal protein l31	1.8478
	AJ625834.1	ribosomal protein l30	-3.27052
	AJ516444.1	ribosomal protein l23a	2.82445
	AJ624732.1	ribosomal protein l21	1.40724
Oxydative stress response	FM177867.1	SOD Mytilus galloprovincialis mRNA for superoxide dismutase (sod gene) GenBank: FM177867.1	-2.12787
Heat chock response	DQ158076.1	Mytilus galloprovincialis heat shock protein 27 (HSP27) mRNA, partial cds 123 bp linear mRNA Accession: DQ158076.1	-1.70558
	DQ178175.1	Mytilus galloprovincialis cytosolic heat shock protein 70 mRNA, partial cds 688 bp linear mRNA Accession: DQ178175.1	1.59453
	DQ178174.1	Mytilus galloprovincialis cytosolic heat shock protein 70 mRNA, partial cds 682 bp linear mRNA Accession: DQ178174.1	-2.56629
	EF140763.1	Mytilus sp. KL-2006 heat shock protein 90 mRNA, partial cds 285 bp linear mRNA Accession: EF140763.1	-1.42992
Phase I detoxification	AF527010.1	Mytilus galloprovincialis glutathione S-transferase GSTpi1 mRNA, complete cds GenBank: AF527010.1	-1.52849
	HQ234335.1	Venerupis philippinarum cytochrome P450 mRNA, complete	-1.94859
Endocrine disruptors	AB257133.2	Mytilus edulis MeER2 mRNA for estrogen receptor, complete cds 1,744 bp linear mRNA Accession: AB257133.2	-1.43394
Mitochondrial activity	KF220385.1	Mytilus trossulus isolate cox1_EL cytochrome c oxidase subunit 1 (cox1) mRNA, partial cds; mitochondrial	3.30109
	KF220400.1	Mytilus trossulus isolate cox3_ES cytochrome c oxidase subunit 3 (cox3) mRNA, partial cds; mitochondrial	-1.41637
	AJ624775.1	mitochondrial aldehyde dehydrogenase 2	1.88937
	AJ626027.1	glutaryl-coenzyme a dehydrogenase	1.26666
	AJ624079.1	cytochrome c oxidase subunit iv	-1.34516
	KF220394.1	Mytilus trossulus isolate nd5_EL NADH dehydrogenase subunit 5 (nd5) mRNA, partial cds; mitochondrial	1.65813
	KF220389.1	Mytilus trossulus isolate nd1_EL NADH dehydrogenase subunit 1 (nd1) mRNA, partial cds; mitochondrial	1.95805
	KF220388.1	Mytilus trossulus isolate cytb_EL cytochrome b (cytb) mRNA, partial cds; mitochondrial 468 bp linear mRNA Accession: KF220388.1	1.97449
	AJ516895.1	mitochondrial cytochrome c oxidase subunit 4	-1.77751
Carbohydrate metabolism	EF570417.1	Mytilus edulis mannose-6-phosphate isomerase (MPI-B) mRNA, partial cds 1,277 bp linear mRNA Accession: EF570417.1	-2.11472
	AJ624093.1	chitinase	-1.43119
	AJ624637.1	chitinase	2.61571
	AY580274.1	Mytilus edulis phosphofructokinase mRNA, partial cds 516 bp linear mRNA Accession: AY580274.1	-2.08134
	AJ624743.1	acetyl-coenzyme a acyltransferase 1	-1.36016
	AJ625322.1	glucose-methanol-choline oxidoreductase	-1.98439
	AJ516599.1	glucose-6-phosphate 1-dehydrogenase	-1.53328
	AJ626213.1	glucose dehydrogenase	2.35538
	AJ624681.1	gdp-l-fucose:beta-d-galactoside 2-alpha-1-fucosyltransferase	1.75536
Cytoskeleton	HM537081.1	Mytilus galloprovincialis alpha-tubulin mRNA, partial cds GenBank: HM537081.1	1.5602
	AJ249992.1	Mytilus galloprovincialis partial mRNA for myosin heavy chain (MHC gene), from pedal retractor muscle 5,463 bp linear mRNA Accession: AJ249992.1	-1.87305
	AJ249991.1	Mytilus galloprovincialis partial mRNA for myosin heavy chain (MHC gene), from catch muscle 5,545 bp linear mRNA Accession: AJ249991.1	-1.71235
	AJ249993.1	Mytilus galloprovincialis mRNA for catchin (catchin gene) 3,530 bp linear mRNA Accession: AJ249993.1	-1.94411
	AJ626386.1	actin binding protein	-2.19052
	AJ624120.1	calponin-like protein	1.27694
	AJ626099.1	calponin-like protein	1.69927
	CD646676.1	UF_105_N09_T7 Crassostrea virginica Gonad Crassostrea virginica cDNA 5- similar to thymosin beta-4 precursor - rat (fragment), mRNA sequence Accession: CD646676.1	1.71527
	AJ624361.1	matrilin-4-like protein	2.05635
	AJ626069.1	collagen type xii alpha 1	1.67452
	AJ626034.1	ficolin 4	1.61161
Proteolysis	EU583801.1	Crassostrea gigas serine protease inhibitor mRNA, partial cds 823 bp linear mRNA Accession: EU583801.1	-1.41244
	JQ027693.1	Crassostrea angulata follistatin-like protein 1 mRNA, complete cds 1,297 bp linear mRNA Accession: JQ027693.1	1.39507
	AJ624491.1	trypsin-like proteinase	-2.90272
	AJ625898.1	proteasome z subunit	1.63128
	AJ624459.1	proteasome 26s non-atpase subunit 8	1.55024
Lysosomal activity	AJ624405.1	gm2 ganglioside activator protein	-1.83817
	AJ624495.1	gm2 ganglioside activator protein	1.76582
Metal resistance	AJ625847.1	isoform mt-10b	2.10934
	AY566247.1	Mytilus galloprovincialis metallothionein 20-IV (MT-20-IV) mRNA, complete cds 449 bp linear mRNA Accession: AY566247.1	2.10994
Adhesion to substrate	HQ236396.1	Mytilus galloprovincialis fibrinogen-related protein (FREP_G1.5) mRNA, partial cds814 bp linear mRNA Accession: HQ236396.1	-1.88525
	HM147143.1	Mytilus edulis fibrinogen-related protein 1 precursor, mRNA, complete cds816 bp linear mRNA Accession: HM147143.1	-1.72681
	EF080942.1	Mytilus galloprovincialis putative contactin-associated protein mRNA, partial cds 722 bp linear mRNA Accession: EF080942.1	2.34632
	EF080942.1	Mytilus galloprovincialis putative contactin-associated protein mRNA, partial cds 722 bp linear mRNA Accession: EF080942.1	2.34632
